# Supplementary material for: Programmed self-assembly of tetrapod nanoparticles with an amphiphilic surface pattern: the effect of arm length and hydrophobic ratio
Source: Royal Society of Chemistry journal article supplement (doi:10.1039/c9me00112c), 2019-01-01
Supplement: c9me00112c1.pdf [file c9me00112c1.pdf]

Electronic Supplementary Material (ESI) for Molecular Systems Design &  
Engineering. This journal is © The Royal Society of Chemistry 2019

## Supplementary Information

# Programmed self-assembly of tetrapod nanoparticles with an amphiphilic surface pattern: the effect of arm length and hydrophobic ratio

*Y. Araki, Y. Kobayashi and N. Arai*

Keio University, 3-14-1 Hiyoshi, Kohoku-ku, Yokohama, Japan Fax: 81 45 566 1846;  
Tel: 81 45 566 1495; E-mail: yusukearaki0109@gmail.com, arai@mech.keio.ac.jp

## **S1. sampled nanoparticle coordinates**

The sampled nanoparticle coordinates are provided in [https://github.com/YusukeARAKI-GitHub/ sampled-tetrapod-nanoparticle-coordinates](https://github.com/YusukeARAKI-GitHub/sampled-tetrapod-nanoparticle-coordinates). These files are tetrapod nanoparticles coordinates in CDVIEW3[S1] format.

Reference:

[S1] A molecular visualization program, CDVIEW3 <http://cdview.sourceforge.net>
